# Supplementary material
Source: publisher site journal article supplement (https://www.dovepress.com/article/589700)
Supplement: Supplementary file 1 [file 589700%20Supplementary%20Material.docx]

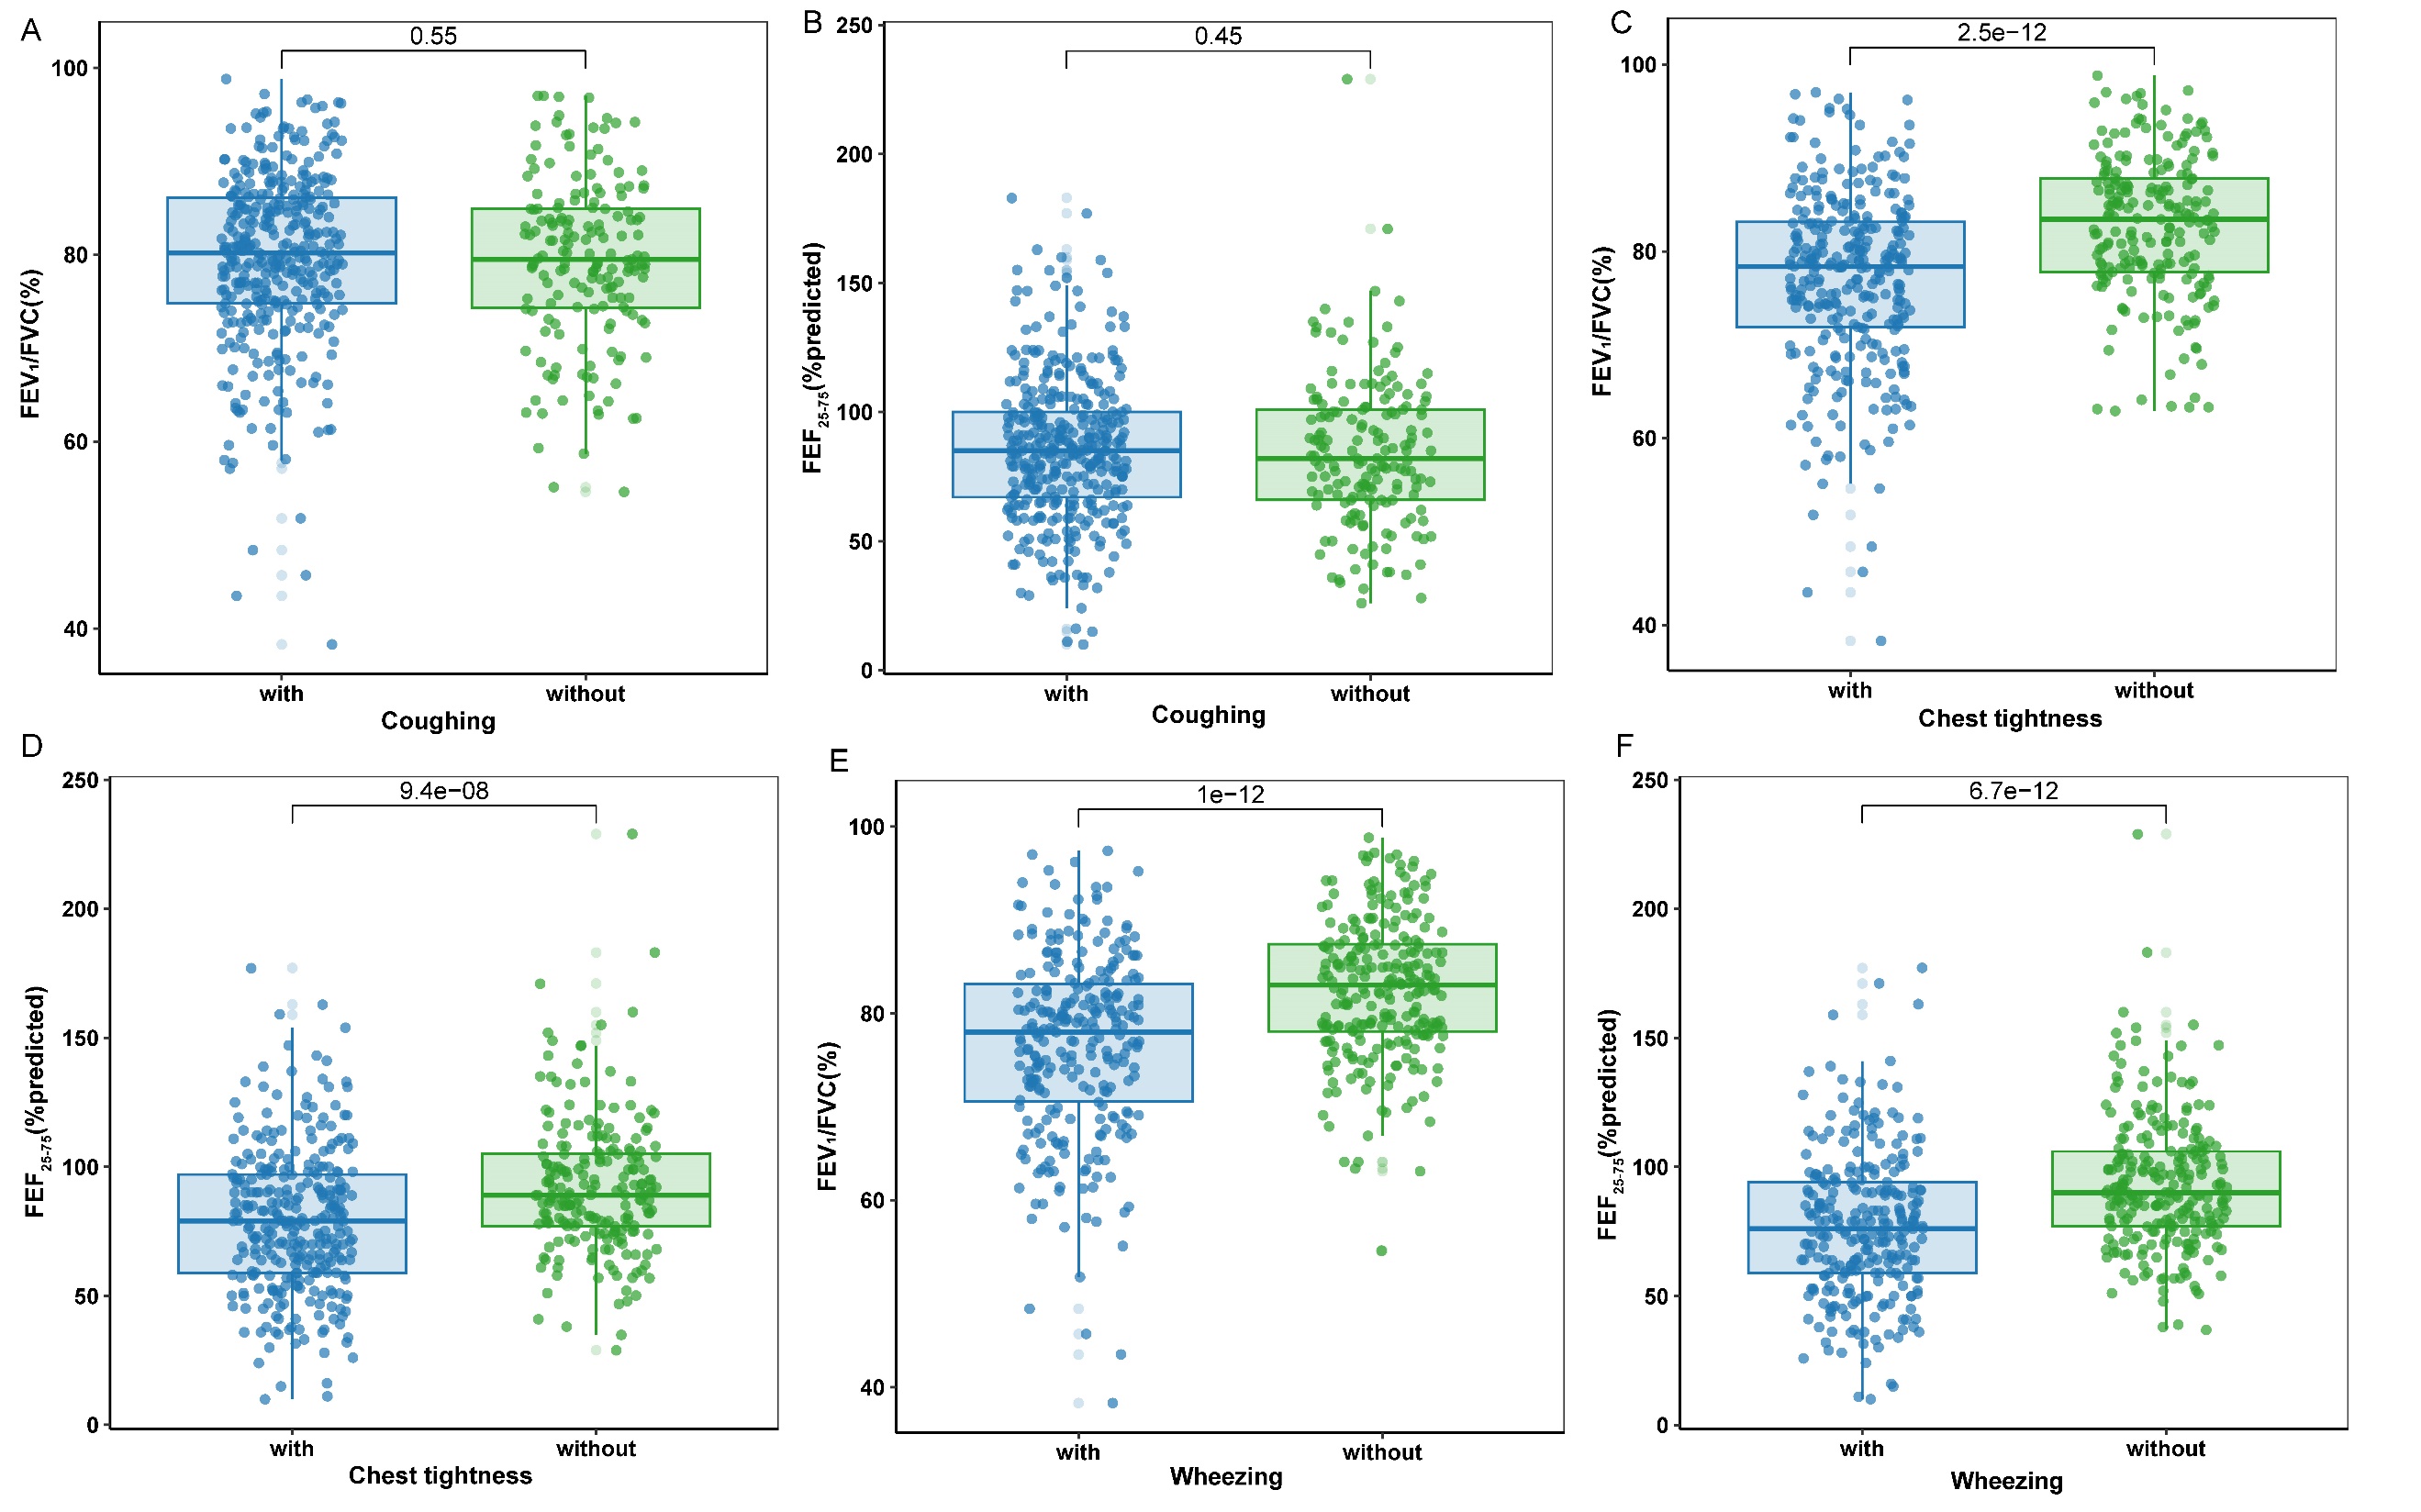


**Figure S1.** Comparison of FEV1/FVC, and FEF25-75 (% predicted) between patients with and without (A-B) coughing, (C-D) chest tightness, and (E-F) wheezing.


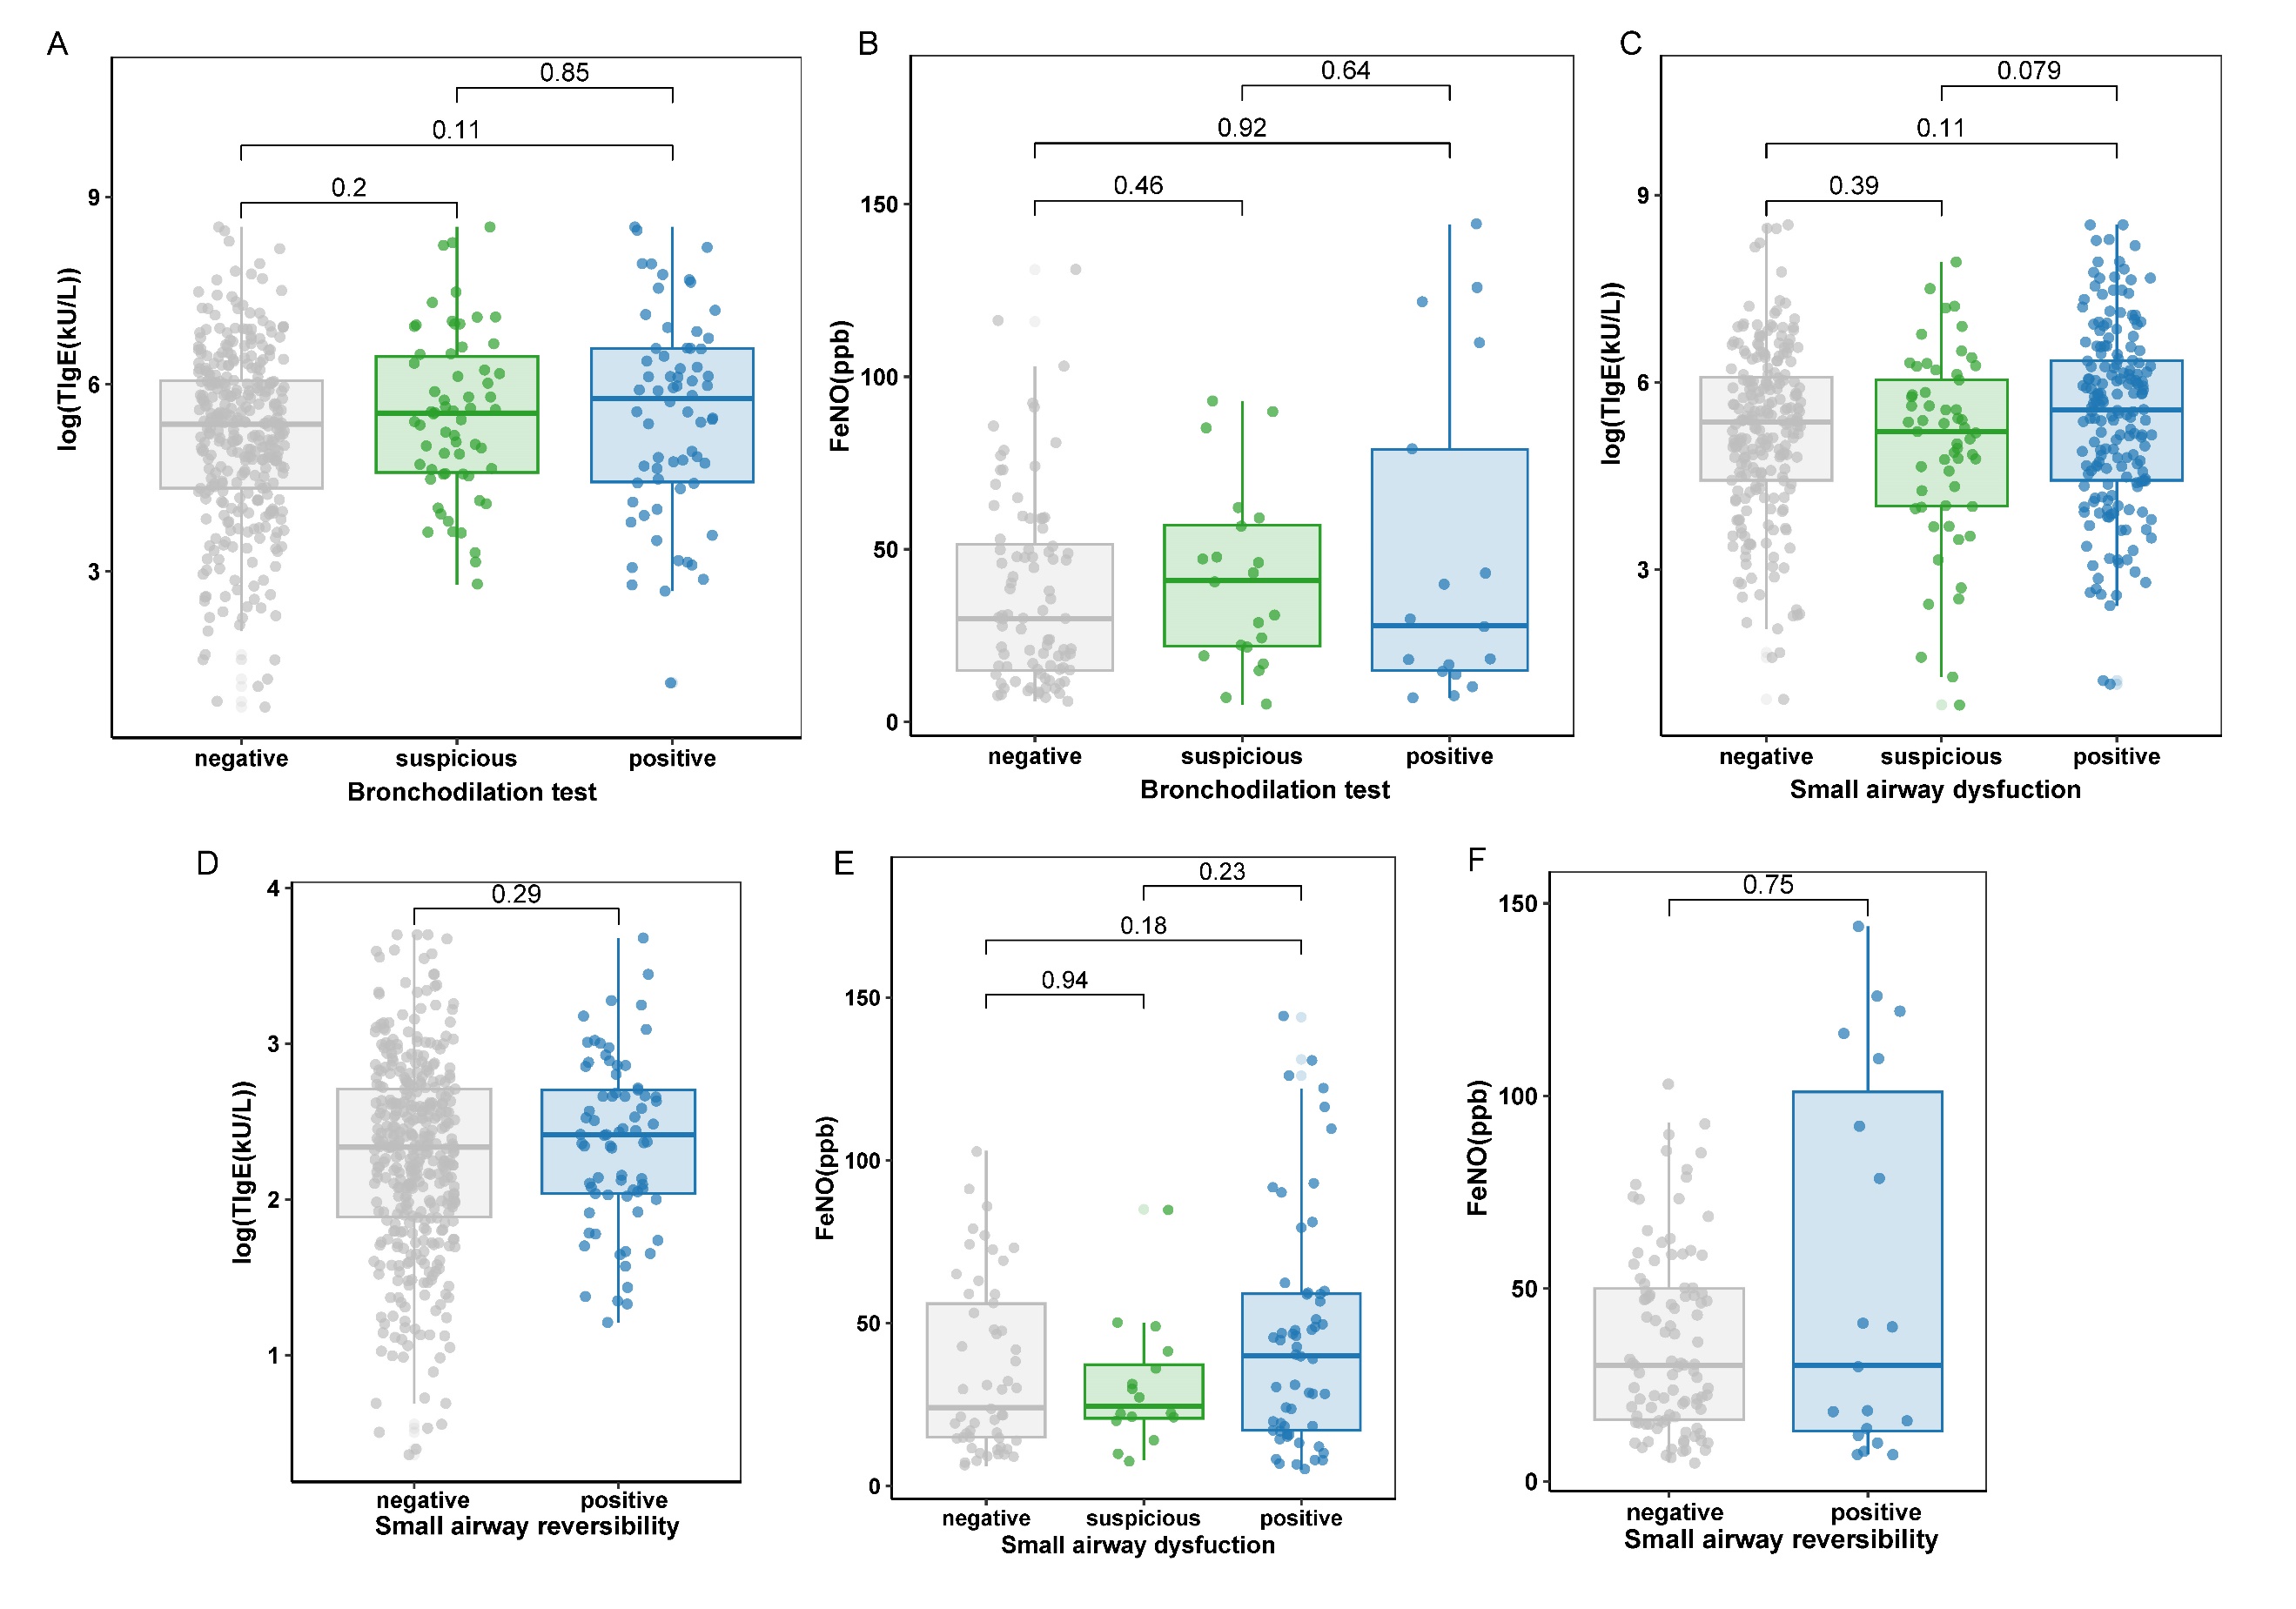


**Figure S2.** Associations between spirometry results and type 2 imflammation indicators. log10 (Total IgE), and FeNO in patients with different results of bronchodilation test (A-B), small airway dysfunction(C, E), and small airway reversibility (D, F).


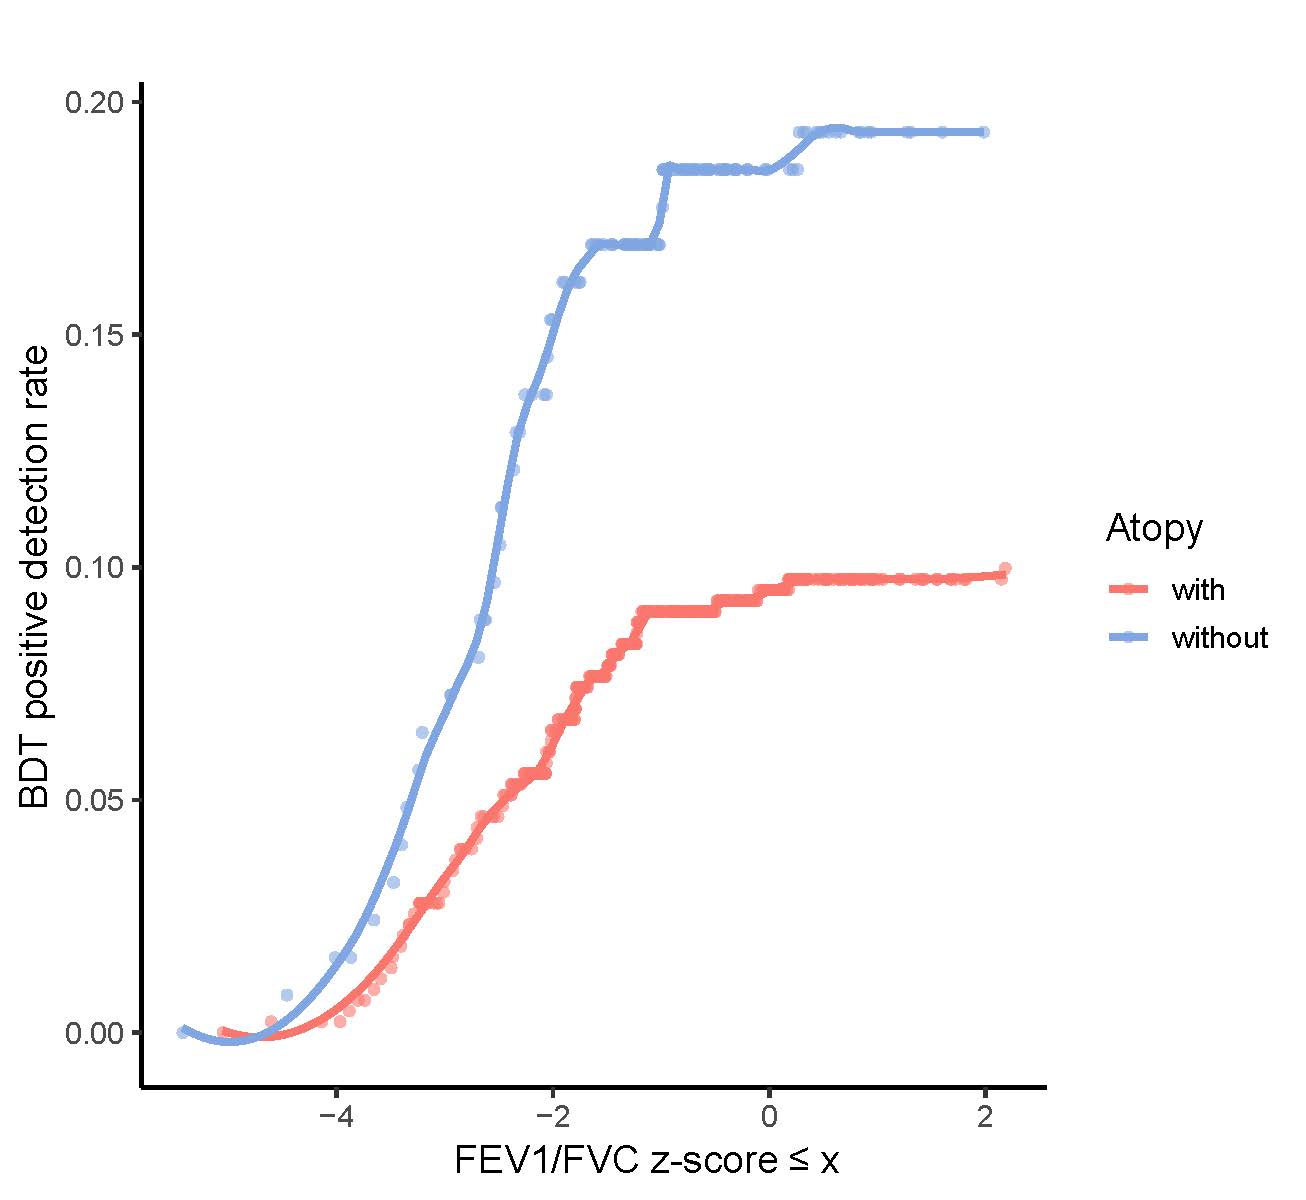


**Figure S3.** Positive detection rates of the BDT at different cut-off values of FEV1/FVC z-score in patients with and without atopy.


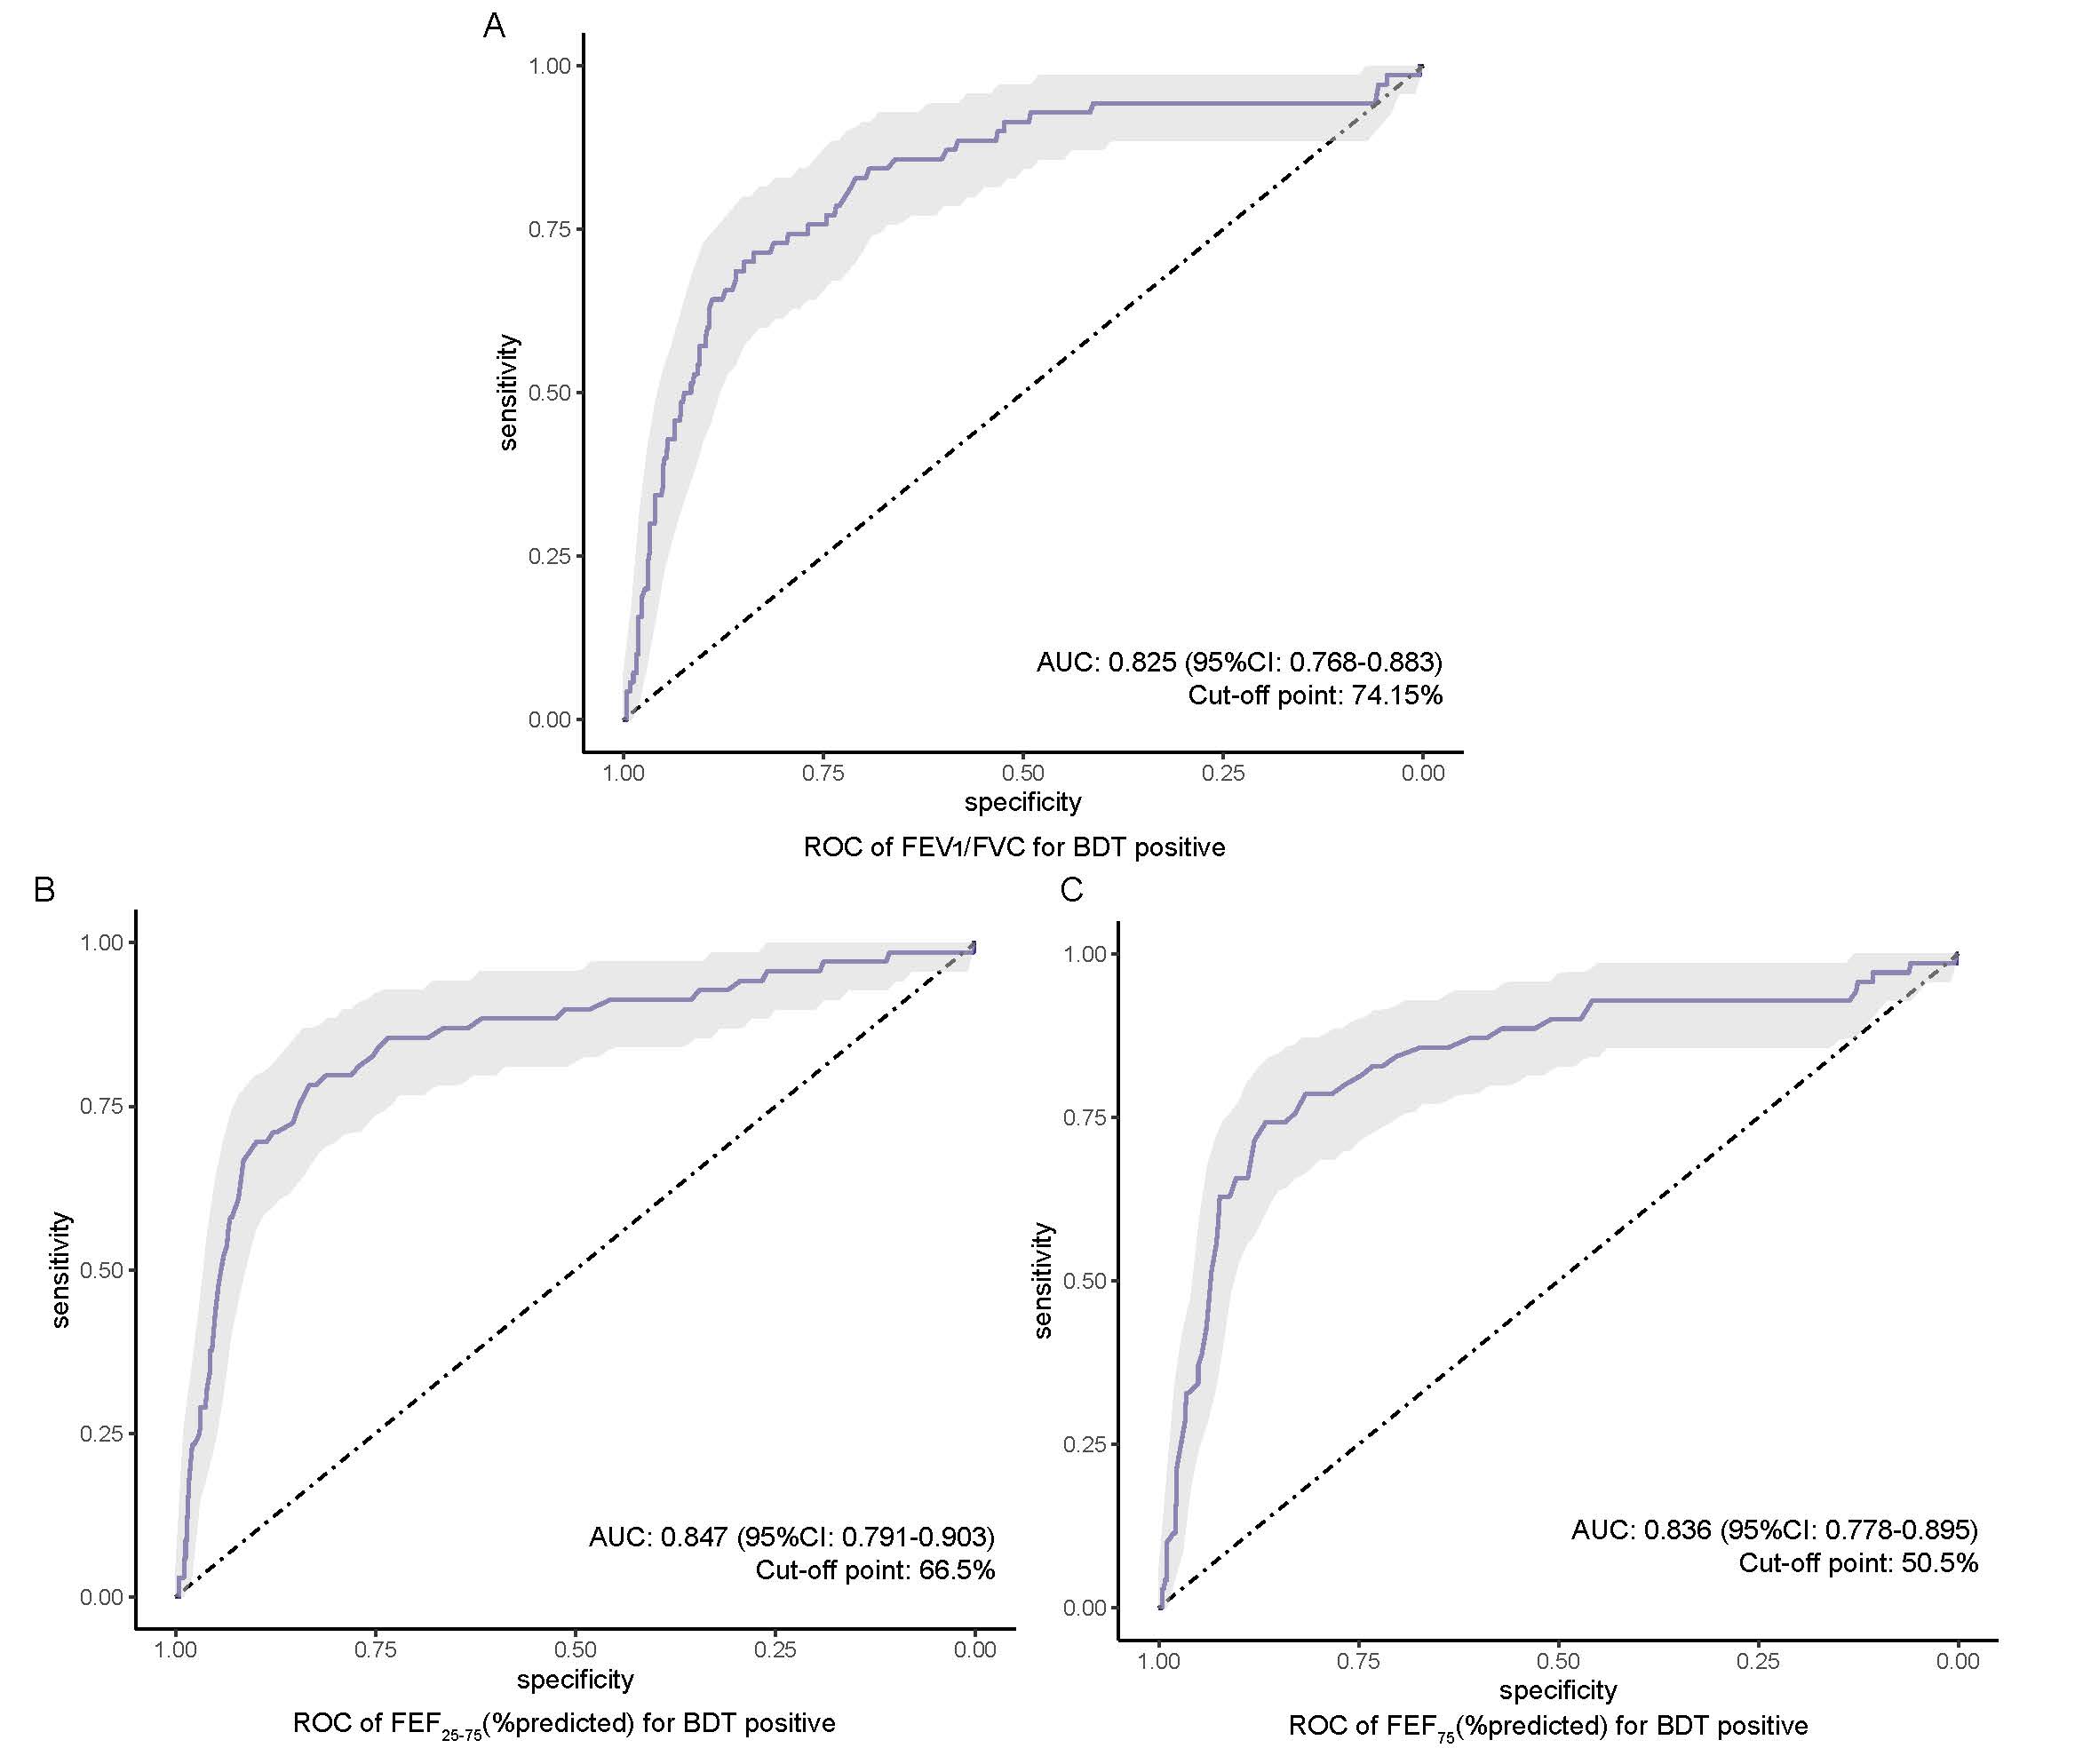


**Figure S4.** Receiver operating characteristic curves of (A) FEV1/FVC, (B) FEF25-75 (% predicted) and (C) FEF75 (% predicted) to predict bronchodilation test positive.


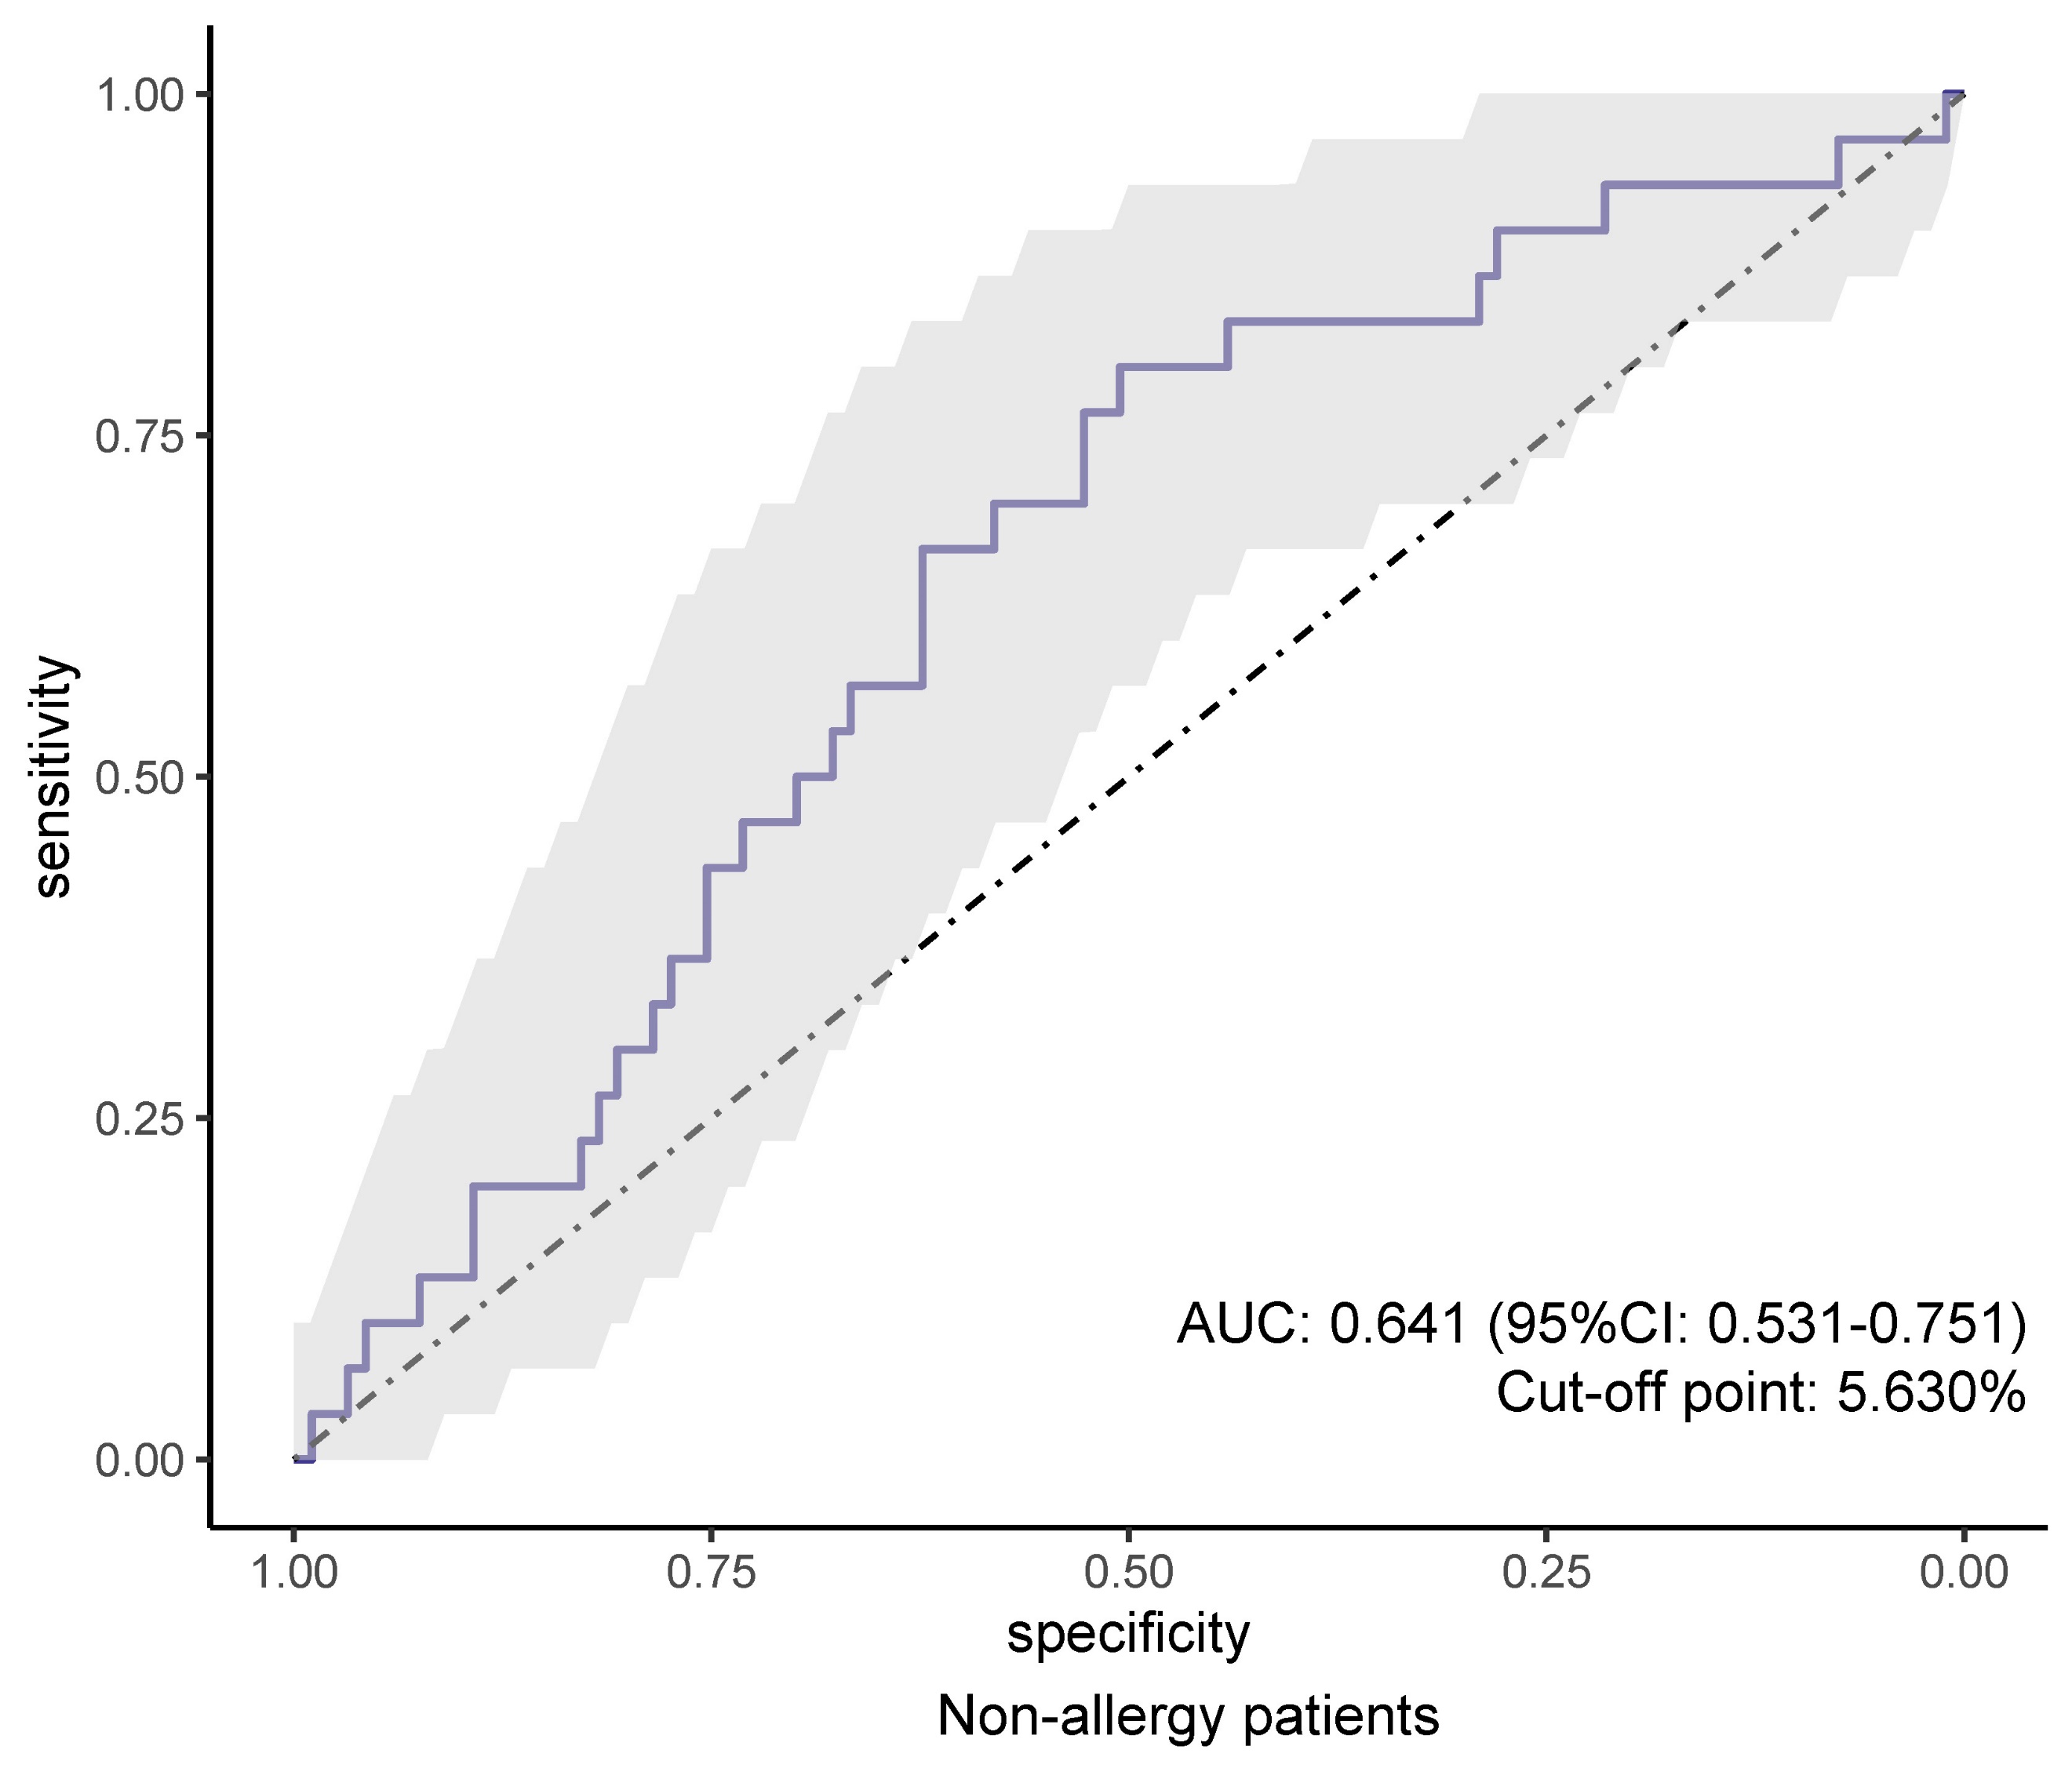


**Figure S5.** Receiver operating characteristic curve of bronchodilation test percent improvements to predict chest tightness and wheezing symptoms in non-allergic patients.

**Supplementary Table 1 Demographic and clinical characteristics of patients in different groups**

| Characteristic | Patients ≤14 ys (n=115) | Patients >14 ys (n=440) | *P*-value |
| --- | --- | --- | --- |
| Male (%) | 79 (68.7) | 157 (35.7) | <0.001 |
| Age, years, mean (SD) | 9.36 (2.51) | 38.71 (13.61) | <0.001 |
| BMI, kg/m2, mean (SD) | 18.94 (3.96) | 23.87 (3.84) | <0.001 |
| Any suspected asthma symptom (%) | 88 (76.5) | 403 (91.8) | <0.001 |
| Coughing (%) | 66 (59.5) | 299 (70.4) | 0.03 |
| Chest tightness (%) | 39 (35.8) | 269 (65.3) | <0.001 |
| Wheezing (%) | 45 (41.3) | 229 (54.8) | 0.01 |

BMI, body mass index
